# Supplementary material
Source: PubMed Central journal article supplement (PMC2830837)
Supplement: supp_M900222-MCP200_Supplemental_data_v30.pdf [file supp_M900222-MCP200_Supplemental_data_v30.pdf]

# Supplementary Information

## Table of Contents

| <b>Section</b>                                                         | <b>Page</b> |
|------------------------------------------------------------------------|-------------|
| A. SOP for the preparation of the yeast protein lysate                 | 2           |
| B. Characterization of the yeast protein lysate                        | 3           |
| C. SOP for Study 6                                                     | 5           |
| D. Methods used for each lab in Study 8                                | 14          |
| E. UPS1 proteins                                                       | 22          |
| F. NCI 20 Proteins                                                     | 23          |
| G. Performance Metrics                                                 | 24          |
| H. CN50 values                                                         | 26          |
| I. Correction of chromatography issue diagnosed by Performance Metrics | 28          |
| J. Instrument parameters for Study 6 & 8                               | 29          |
| K. References                                                          | 32          |

## A. SOP for the preparation of the yeast protein lysate

### Reagents

YPD (Bio101 system, Cat# 4001-032, Lot# 4001-032-101401)

Kanamycin Sulfate (Shelton Scientific Inc, Cat# IBU2120, Lot# 6I1150)

Trichloroacetic Acid (TCA) (VWR (100% W/V), Cat# 3372-2, Lot# 7022)

Acetone (Burdick & Jackson, Inc, Cat# AH010-4, Lot# 10071741)

Yeast stock BY4741 (MATa leu2 $\Delta$ 0 met15  $\Delta$ 0 ura3  $\Delta$ 0 his3  $\Delta$ 1) (Open Biosystems, Cat# YSC1048-645440)

### Protocol

All steps of this protocol were completed by Boston Biochem (Cambridge, MA), the commercial concern that produced the lysate.

- Yeast from glycerol stock were struck out onto a YPD plate and incubated overnight at 30°C. The plate contained colonies of uniform shape, size and color.
- Inoculated 500 ml of YPD (supplemented with 25  $\mu$ g/ml Kanamycin) with yeast from patch of cells (not an individual colony) and grown overnight at 30°C with shaking.
- Diluted 100 ml of overnight culture into 10 L of YPDKan in a fermentor and grown at 30°C. Initial OD600 = 0.21. Growth was done with aeration at 10K CC/min, agitation at 30 rpm.
- The OD600 was monitored every 30 minutes using a spectrophotometer.
- When the culture reached OD600 = 0.93 (~ 5 hours), the yeast was harvested using a Sharples continuous-flow centrifuge (over 30K rpm).
- Total pellet wet weight obtained = 5.4 g.
- The cell pellet was resuspended and washed 3 times in 150 ml ice-cold sterile water to remove residual media. The washes were monitored at OD600 until absorbance was at baseline.
- The washed cell pellet was then resuspended in 160 ml of ice-cold sterile water. The suspension was split into two sterile tubes and 80 ml of ice-cold 20% TCA was added to each (final TCA concentration is 10%).
- Each tube was incubated with agitation at 4°C for 1 hour to facilitate cell lysis.
- The precipitate was collected by centrifugation at 18.3K rpm (50,000g) for 30 minutes.
- Each pellet was washed with 160 ml ice-cold 90% acetone. The pellet was recovered by centrifugation at 18.3K rpm (50,000g) for 30 minutes.
- The acetone wash and centrifugation were repeated and all liquid removed.
- The pellet was flash-frozen in liquid nitrogen, transferred to a sterile 50 ml conical tube, and lyophilized.
- The lyophilized pellet was stored at -80°C or dry ice (as required).

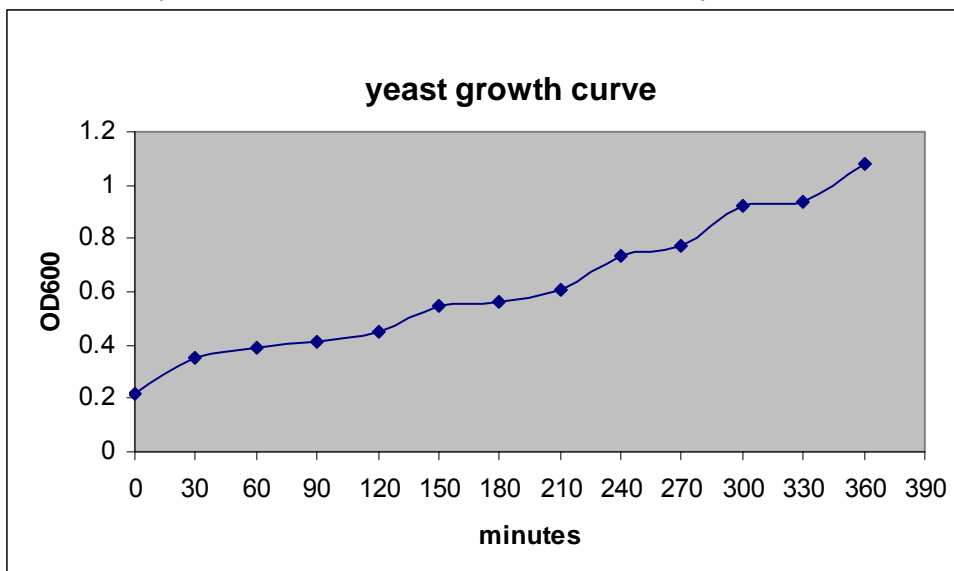

**Yeast Growth Curve.** The OD600 was monitored every 30 minutes using a spectrophotometer. The cells were harvested when the culture reached OD600 = 0.93 (~ 5 hours), corresponding to late log phase growth.

## B. Quality Control studies of yeast protein lysate

To prepare the material for LC-MS analysis, the solubilized lysate was digested with trypsin using the procedure of Piening *et al.* (1). In brief, the yeast protein (approximately 1 mg/ml in 50 mM ammonium bicarbonate, 8 M urea at pH 8.0), was reduced and denatured at 60 °C for 1 h following the addition of dithiothreitol at a concentration of 15 mM. Next, the proteins were alkylated by adding iodoacetamide to a concentration of 25 mM. After quenching the reaction by the addition of dithiothreitol (DTT) to a concentration of 50 mM, the solution was diluted 8-fold with 50 mM aqueous ammonium bicarbonate. Digestion with trypsin was carried out at 37 °C for approximately 18 h. The digestion was halted by the addition of acetic acid to a concentration of 1% and the sample was stored at -80 °C prior to analysis. All reagents used, including trypsin, were from Sigma and used without further purification.

For LC-MS analysis, varying amounts of the trypsin digest, corresponding to approximately 5, 25 and 50 pmol of total yeast protein, were injected onto an Atlantis dC18 column (3 µm particle size, 300 µm x 150 mm; Waters, Milford, MA). Elution was accomplished with a 2 h gradient from 3 % to 40 % acetonitrile in an aqueous solution of 0.1 % formic acid using a flow rate of 15 µl/min. For the LC-MS analysis, a Waters nanoAcquity LC was coupled to a Waters QToF Premier mass spectrometer. Mass spectra were obtained from m/z 400 to m/z 1600 with a scan time of 1 s. A 300 µM solution of glu-fibrinopeptide in a 50 % acetonitrile, 50 % water was sprayed at 2 µl/min, orthogonally to the LC effluent spray, for lock-mass calibration.

Prior to data analysis, the Waters RAW file was converted to mzXML format using *massWolf* (<http://tools.proteomecenter.org/wiki/index.php?title=Software:massWolf>). For feature detection/analysis of the LC-MS TIC, *msInspect* (2) (build # 4603, <http://proteomics.fhcrc.org/CPL/msinspect.html>) was used. To count the total number of features, the output file generated by *msInspect* was imported into Excel and the total number of entries was used to determine the total number of features detected.

LC-MS/MS analysis of the digestion was performed on a Thermo LTQ using a 95 min gradient as described in the SOP (Supplemental Section C). The results were searched using the MyriMatch algorithm (3) and the results run through the IDPicker algorithm (4) to determine the total confidently identified spectra, peptides, proteins and most parsimonious protein groups.

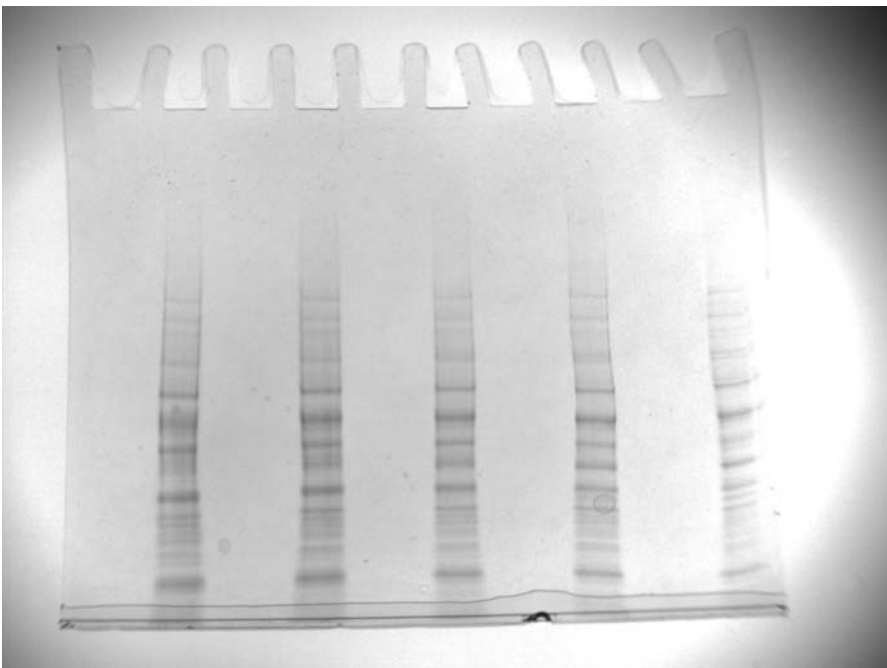

1D-PAGE results from the analysis of the yeast lysate. The sample loading for the 5 lanes, from left to right, was approximately 12.5 µg, 10 µg, 7.5 µg, 5 µg, and 2.5 µg total protein.

Total number of LC-MS featured detected at various sample loads of the trypsin digest of the yeast lysate. The number of features was determined using *msInspect* (2).

| <b>Total Protein (pre-digestion) on Column</b> | <b>Number of Features Detected</b> |
|------------------------------------------------|------------------------------------|
| 5 pmol                                         | 303                                |
| 25 pmol                                        | 3588                               |
| 50 pmol                                        | 7924                               |

## C. Study 6 SOP

| Sample       | Description                                   | [Total Yeast Protein] | [Sigma48]    |
|--------------|-----------------------------------------------|-----------------------|--------------|
| Sample 6-QC1 | Sigma48                                       | 0                     | 20 fmol/uL   |
| Sample 6-QC2 | unspiked digested yeast                       | 60 ng/ $\mu$ L        | 0            |
| Sample 1-B   | digested NCI-20 protein mix                   |                       |              |
| Sample 6A    | 0.25 fmol/uL Sigma48 spiked into yeast digest | 60 ng/uL              | 0.25 fmol/uL |
| Sample 6B    | 0.74 fmol/uL Sigma48 spiked into yeast digest | 60 ng/uL              | 0.74 fmol/uL |
| Sample 6C    | 2.2 fmol/uL Sigma48 spiked into yeast digest  | 60 ng/uL              | 2.2 fmol/uL  |
| Sample 6D    | 6.7 fmol/uL Sigma48 spiked into yeast digest  | 60 ng/uL              | 6.7 fmol/uL  |
| Sample 6E    | 20 fmol/uL Sigma48 spiked into yeast digest   | 60 ng/uL              | 20 fmol/uL   |

An equimolar mixture of 48 human proteins (Sigma UPS1) was prepared for Study 6 as follows:

### TFE-assisted Digestion of Sigma 48

1. Resuspend contents of a single Sigma 48 vial in:  
50  $\mu$ L 100 mM ammonium bicarbonate pH 8  
50  $\mu$ L TFE (Acros Organics)

Incubate at 60 °C for 45 minutes and vortex repeatedly. You'll see solid material "stuck" at the bottom of the vial; vortex to try to get as much of this into solution as possible.

2. Reduce (using 1/10 volume) with 10  $\mu$ L of 50 mM DTT (prepared in water) and incubate at 55-66°C for 20 minutes.

3. Cool to room temperature and alkylate with 10  $\mu$ L of 100 mM IAM (also prepared in water) and incubate in the dark for 20 minutes.

4. Dilute with enough volume of Ambic pH 8 (360  $\mu$ L) so the final concentration of TFE is about  $\leq$ 10 % prior to adding the trypsin.

5. Add trypsin (Promega) in 1:50 ratio. Trypsin concentration is 0.01  $\mu$ g/ $\mu$ L in 100 mM Ambic, and based on the average protein concentration of a Sigma 48 vial (around 6.5  $\mu$ g), add 20  $\mu$ L of the 0.01  $\mu$ g/ $\mu$ L trypsin stock.

6. Digest at 37° C overnight, dry down and reconstitute in 0.1 % formic acid for LC/MS/MS analysis. I reconstituted in 50  $\mu$ L = 100 fmol/ $\mu$ L

(Note: DTT and IAM were from Sigma.)

For Study 6, 1 vial of digested Sigma48 (Sample 6-QC1), 1 vial of digested, unspiked yeast (Sample 6-QC2), 1 vial of digested NCI 20 protein mix (Sample 1B; see Supplemental Section H and Rudnick *et. al.*, *Submitted*) and 5 vials with varying concentrations of digested Sigma48 spiked into digested yeast (Samples 6A-6E) were sent to each laboratory. Prior to analysis, **Sample 1B was diluted 150-fold with 0.1% formic acid in water.** All other samples were not diluted. 120 ng of the yeast proteome digest was loaded on column.

Below are checklists that outline the HPLC and mass spectrometry parameters of this SOP for both a Thermo LTQ and Thermo Orbitrap. The run order for the samples follows the checklists.

If possible, participants should pack their columns at 1000 PSI in methanol and then finish packing with the HPLC at 50:50 0.1% formic:acetonitrile on the HPLC for 30 min prior to cutting back the columns to their final dimensions. The column should also be conditioned prior to use with an injection of a concentrated protein digest (such as a BSA digest) followed by several injections of a less concentrated digest. Several blank runs should be performed after conditioning to eliminate carryover of the conditioning digest into the first blank of the study.

## Study 6 LTQ SOP Checklist

| Study 6 LTQ SOP Checklist |                             |              |       |
|---------------------------|-----------------------------|--------------|-------|
| Source/APstack parameters |                             |              | Notes |
| <input type="checkbox"/>  | Capillary temperature       | 150 ± 25°C   |       |
| <input type="checkbox"/>  | Capillary voltage           | 48 ± 20 V    |       |
| <input type="checkbox"/>  | Tube Lens                   | 100 ± 25 V   |       |
| <input type="checkbox"/>  | Source voltage              | 2.0 ± 0.5 kV |       |
| Tune File Parameters      |                             |              | Notes |
| <input type="checkbox"/>  | Ion Trap Full Microscans    | 1            |       |
| <input type="checkbox"/>  | Ion Trap MSn Microscans     | 1            |       |
| <input type="checkbox"/>  | Ion Trap Full Max Ion Time  | 100          |       |
| <input type="checkbox"/>  | Ion Trap MSn Max Ion Time   | 100          |       |
| <input type="checkbox"/>  | Ion Trap Full AGC Target    | 30,000       |       |
| <input type="checkbox"/>  | Ion Trap MSn AGC Target     | 10,000       |       |
| MS detector               |                             |              | Notes |
| <input type="checkbox"/>  | Acquire time (min)          | 184          |       |
| <input type="checkbox"/>  | Start delay (min)           | 15           |       |
| <input type="checkbox"/>  | Segments                    | 1            |       |
| <input type="checkbox"/>  | Scan Events                 | 9            |       |
| <input type="checkbox"/>  | Scan Range for Event 1      | m/z 300-2000 |       |
| <input type="checkbox"/>  | Mass range for all events   | Normal       |       |
| <input type="checkbox"/>  | Scan Rate for all events    | Normal       |       |
| <input type="checkbox"/>  | Polarity for all events     | Positive     |       |
| <input type="checkbox"/>  | Data type for MS scan       | Centroid     |       |
| <input type="checkbox"/>  | Data Type for MSn Scan      | Centroid     |       |
| <input type="checkbox"/>  | Additional microscans       | 0            |       |
| Dynamic Exclusion         |                             |              | Notes |
| <input type="checkbox"/>  | Repeat Count                | 1            |       |
| <input type="checkbox"/>  | Repeat duration (s)         | 0            |       |
| <input type="checkbox"/>  | Exclusion list size         | 150          |       |
| <input type="checkbox"/>  | Exclusion duration (s)      | 60           |       |
| <input type="checkbox"/>  | Exclusion mass width        | By mass      |       |
| <input type="checkbox"/>  | Exclusion mass width (low)  | 1.0          |       |
| <input type="checkbox"/>  | Exclusion mass width (high) | 3.5          |       |
| <input type="checkbox"/>  | Early expiration is NOT     |              |       |

|                                    |                          | used                                                                                                  |                                        |       |
|------------------------------------|--------------------------|-------------------------------------------------------------------------------------------------------|----------------------------------------|-------|
| Scan Event                         |                          |                                                                                                       |                                        | Notes |
|                                    | <input type="checkbox"/> | Charge state screening and Rejection is NOT enabled                                                   |                                        |       |
|                                    | <input type="checkbox"/> | Minimum MS signal Threshold for MS2 trigger                                                           | 500                                    |       |
|                                    | <input type="checkbox"/> | Mass determined from scan event                                                                       | 1                                      |       |
|                                    | <input type="checkbox"/> | Activation type                                                                                       | CID                                    |       |
|                                    | <input type="checkbox"/> | Default charge state                                                                                  | 4                                      |       |
|                                    | <input type="checkbox"/> | Isolation width (m/z)                                                                                 | 2.0                                    |       |
|                                    | <input type="checkbox"/> | Normalized collision energy                                                                           | 28                                     |       |
|                                    | <input type="checkbox"/> | Activation Q                                                                                          | 0.250                                  |       |
|                                    | <input type="checkbox"/> | Activation time (ms)                                                                                  | 30.0                                   |       |
|                                    | <input type="checkbox"/> | Mass lists and global mass lists NOT used                                                             |                                        |       |
|                                    | <input type="checkbox"/> | Wideband Activation NOT used                                                                          |                                        |       |
|                                    | <input type="checkbox"/> | For each Current Scan Event, the Nth most intense ion is set at 8-1 for scan events 2-9, respectively |                                        |       |
| HPLC Parameters and chromatography |                          |                                                                                                       |                                        | Notes |
|                                    | <input type="checkbox"/> | Autosampler temperature                                                                               | 10C                                    |       |
|                                    | <input type="checkbox"/> | Column dimensions                                                                                     | 11-13 cm x 100 $\mu$ m*                |       |
|                                    | <input type="checkbox"/> | Precolumn dimensions                                                                                  | 2-4 cm x 100 $\mu$ m**                 |       |
|                                    | <input type="checkbox"/> | Column packing material                                                                               | Jupiter C18                            |       |
|                                    | <input type="checkbox"/> | Column temperature                                                                                    | Room temperature                       |       |
|                                    | <input type="checkbox"/> | Mobile phase A                                                                                        | 0.1% (v/v) formic acid in water        |       |
|                                    | <input type="checkbox"/> | Mobile phase B                                                                                        | 0.1% (v/v) formic acid in acetonitrile |       |
|                                    | <input type="checkbox"/> | Injection volume                                                                                      | 2.0 $\mu$ L                            |       |
|                                    | <input type="checkbox"/> | Injection loop (or needle) volume                                                                     | 8.0 $\mu$ L***                         |       |
|                                    | <input type="checkbox"/> | Flow rate for gradient                                                                                | 600 nL/min at column tip               |       |
|                                    | <input type="checkbox"/> | Flow rate for loading phase                                                                           | 1.2 $\mu$ L/min                        |       |
|                                    | <input type="checkbox"/> | 184 min HPLC gradient for yeast samples                                                               | As per attached table                  |       |
|                                    | <input type="checkbox"/> | 95 min HPLC gradient for NCI20 and blanks samples                                                     | As per attached table                  |       |

\* Column length may vary depending upon the individual nanospray set up, but inner diameter should remain the same.

\*\* Precolumn is optional depending upon individual laboratory expertise, but should be used if at all possible. Column length may vary depending upon the individual nanospray set up, but inner diameter should remain the same.

\*\*\* If not possible to achieve, use same set up as dress rehearsal and make note of change.

| <b>184 min HPLC Gradient with “vented” column for yeast samples</b> |     |    |                    |            |       |
|---------------------------------------------------------------------|-----|----|--------------------|------------|-------|
| Time                                                                | %A  | %B | Flow path          | Flow rate  | Notes |
| 0                                                                   | 100 | 0  | To Waste*          | 1.2 uL/min |       |
| 0.01                                                                | 100 | 0  | To Waste           | 1.2 uL/min |       |
| 10                                                                  | 100 | 0  | To Waste           | 1.2 uL/min |       |
| 15                                                                  | 98  | 2  | To Waste           | 1.2 uL/min |       |
| 15.01                                                               | 98  | 2  | To column (source) | 600 nL/min |       |
| 135                                                                 | 60  | 40 | To column (source) | 600 nL/min |       |
| 150                                                                 | 10  | 90 | To column (source) | 600 nL/min |       |
| 155                                                                 | 10  | 90 | To column (source) | 600 nL/min |       |
| 159                                                                 | 10  | 90 | To column (source) | 600 nL/min |       |
| 164                                                                 | 95  | 5  | To column (source) | 600 nL/min |       |
| 169                                                                 | 100 | 0  | To column (source) | 600 nL/min |       |
| 184                                                                 | 100 | 0  | To column (source) | 600 nL/min |       |

\*If using a precolumn, the flow should be directed to waste.

| <b>95 min HPLC Gradient with “vented” column for blanks and NCI-20</b> |     |    |                    |            |       |
|------------------------------------------------------------------------|-----|----|--------------------|------------|-------|
| Time                                                                   | %A  | %B | Flow               | Flow rate  | Notes |
| 0                                                                      | 100 | 0  | To Waste*          | 1.2 uL/min |       |
| 0.01                                                                   | 100 | 0  | To Waste           | 1.2 uL/min |       |
| 10                                                                     | 100 | 0  | To Waste           | 1.2 uL/min |       |
| 15                                                                     | 98  | 2  | To Waste           | 1.2 uL/min |       |
| 15.01                                                                  | 98  | 2  | To column (source) | 600 nL/min |       |
| 50                                                                     | 75  | 25 | To column (source) | 600 nL/min |       |
| 65                                                                     | 10  | 90 | To column (source) | 600 nL/min |       |
| 70                                                                     | 10  | 90 | To column (source) | 600 nL/min |       |
| 74                                                                     | 10  | 90 | To column (source) | 600 nL/min |       |
| 75                                                                     | 95  | 5  | To column (source) | 600 nL/min |       |
| 80                                                                     | 100 | 0  | To column (source) | 600 nL/min |       |
| 95                                                                     | 100 | 0  | To column (source) | 600 nL/min |       |

\*If using a precolumn, the flow should be directed to waste.



## Run order:

This series of samples was run in **triplicate**, either back-to-back or as three separate replicates with other samples or maintenance in between. (If the series is run back-to-back, there is no need to run the Sample 1B (NCI20) two times in a row.)

| <b>Run number</b> | <b>Sample</b>                                             | <b>Gradient</b>  |
|-------------------|-----------------------------------------------------------|------------------|
| 1                 | <b>Sample 1-B-NCI20</b>                                   | 95 min gradient  |
| 2                 | Wash*                                                     |                  |
| 3                 | Blank                                                     | 95 min gradient  |
| 4                 | <b>Sample 6-QC2 –Yeast only</b>                           | 184 min gradient |
| 5                 | Wash*                                                     |                  |
| 6                 | Blank                                                     | 95 min gradient  |
| 7                 | <b>Sample 6A - 0.25 fmol/uL<br/>Sigma 48 spiked yeast</b> | 184 min gradient |
| 8                 | Wash*                                                     |                  |
| 9                 | Blank                                                     | 95 min gradient  |
| 10                | <b>Sample 6B - 0.74 fmol/uL<br/>Sigma 48 spiked yeast</b> | 184 min gradient |
| 11                | Wash*                                                     |                  |
| 12                | Blank                                                     | 95 min gradient  |
| 13                | <b>Sample 6C - 2.2 fmol/uL<br/>Sigma 48 spiked yeast</b>  | 184 min gradient |
| 14                | Wash*                                                     |                  |
| 15                | Blank                                                     | 95 min gradient  |
| 16                | <b>Sample 6D - 6.7 fmol/uL<br/>Sigma 48 spiked yeast</b>  | 184 min gradient |
| 17                | Wash*                                                     |                  |
| 18                | Blank                                                     | 95 min gradient  |
| 19                | <b>Sample 6E - 20 fmol/uL<br/>Sigma 48 spiked yeast</b>   | 184 min gradient |
| 20                | Wash*                                                     |                  |
| 21                | Blank                                                     | 95 min gradient  |
| 22                | <b>Sample 6-QC1 - Sigma 48<br/>only</b>                   | 184 min gradient |
| 23                | Wash*                                                     |                  |
| 24                | Blank                                                     | 95 min gradient  |
| 25                | <b>Sample 1-B-NCI20</b>                                   | 95 min gradient  |

\* As per individual laboratory protocol

## Study 6 Orbitrap SOP Checklist

| Source/APstack parameters      |                          |                                |              | Notes |
|--------------------------------|--------------------------|--------------------------------|--------------|-------|
|                                | <input type="checkbox"/> | Capillary temperature          | 150 ± 25°C   |       |
|                                | <input type="checkbox"/> | Capillary voltage              | 48 ± 20 V    |       |
|                                | <input type="checkbox"/> | Tube Lens                      | 100 ± 25 V   |       |
|                                | <input type="checkbox"/> | Source voltage                 | 2.0 ± 0.5 kV |       |
| Tune File Parameters           |                          |                                |              | Notes |
|                                | <input type="checkbox"/> | FTMS Full Microscans           | 1            |       |
|                                | <input type="checkbox"/> | Ion Trap MSn Microscans        | 1            |       |
|                                | <input type="checkbox"/> | FTMS Full Max Ion Time         | 1000         |       |
|                                | <input type="checkbox"/> | Ion Trap MSn Max Ion Time      | 100          |       |
|                                | <input type="checkbox"/> | FTMS Full AGC Target           | 1,000,000    |       |
|                                | <input type="checkbox"/> | Ion Trap MSn AGC Target        | 10,000       |       |
| MS detector                    |                          |                                |              | Notes |
|                                | <input type="checkbox"/> | Acquire time (min)             | 184          |       |
|                                | <input type="checkbox"/> | Start delay (min)              | 15           |       |
|                                | <input type="checkbox"/> | Segments                       | 1            |       |
|                                | <input type="checkbox"/> | Scan Events                    | 9            |       |
|                                | <input type="checkbox"/> | Scan Range for Event 1         | m/z 300-2000 |       |
|                                | <input type="checkbox"/> | Mass range for all events      | Normal       |       |
|                                | <input type="checkbox"/> | Scan Rate for all events       | Normal       |       |
|                                | <input type="checkbox"/> | Polarity for all events        | Positive     |       |
|                                | <input type="checkbox"/> | Data type for MS scan          | Profile      |       |
|                                | <input type="checkbox"/> | Data Type for MSn Scan         | Centroid     |       |
|                                | <input type="checkbox"/> | Additional microscans          | 0            |       |
|                                | <input type="checkbox"/> | Resolution of MS scan          | 60,000       |       |
|                                | <input type="checkbox"/> | Lock mass is NOT enabled       |              |       |
| Dynamic Exclusion              |                          |                                |              | Notes |
|                                | <input type="checkbox"/> | Repeat Count                   | 1            |       |
|                                | <input type="checkbox"/> | Repeat duration (s)            | 0            |       |
|                                | <input type="checkbox"/> | Exclusion list size            | 150          |       |
|                                | <input type="checkbox"/> | Exclusion duration (s)         | 60           |       |
|                                | <input type="checkbox"/> | Exclusion mass width           | By mass      |       |
|                                | <input type="checkbox"/> | Exclusion mass width (low)     | 0.6          |       |
|                                | <input type="checkbox"/> | Exclusion mass width (high)    | 0.6          |       |
|                                | <input type="checkbox"/> | Early expiration is NOT used   |              |       |
| Global Data-Dependent Settings |                          |                                |              | Notes |
|                                | <input type="checkbox"/> | Charge state screening enabled |              |       |
|                                | <input type="checkbox"/> | Monoisotopic precursor         |              |       |

|                                           |                          |                                                                                                       |                                        |              |
|-------------------------------------------|--------------------------|-------------------------------------------------------------------------------------------------------|----------------------------------------|--------------|
|                                           |                          | selection enabled                                                                                     |                                        |              |
|                                           | <input type="checkbox"/> | Non-peptide monoisotopic recognition enabled                                                          |                                        |              |
|                                           | <input type="checkbox"/> | Charge state +1 rejected                                                                              |                                        |              |
|                                           | <input type="checkbox"/> | Unassigned charge state rejected                                                                      |                                        |              |
| <b>Scan Event</b>                         |                          |                                                                                                       |                                        | <b>Notes</b> |
|                                           | <input type="checkbox"/> | Minimum MS signal Threshold for MS2 trigger                                                           | 500                                    |              |
|                                           | <input type="checkbox"/> | Mass determined from scan event                                                                       | 1                                      |              |
|                                           | <input type="checkbox"/> | Activation type                                                                                       | CID                                    |              |
|                                           | <input type="checkbox"/> | Default charge state                                                                                  | 4                                      |              |
|                                           | <input type="checkbox"/> | Isolation width (m/z)                                                                                 | 2.0                                    |              |
|                                           | <input type="checkbox"/> | Normalized collision energy                                                                           | 28                                     |              |
|                                           | <input type="checkbox"/> | Activation Q                                                                                          | 0.250                                  |              |
|                                           | <input type="checkbox"/> | Activation time (ms)                                                                                  | 30.0                                   |              |
|                                           | <input type="checkbox"/> | Mass lists and global mass lists NOT used                                                             |                                        |              |
|                                           | <input type="checkbox"/> | Wideband Activation NOT used                                                                          |                                        |              |
|                                           | <input type="checkbox"/> | For each Current Scan Event, the Nth most intense ion is set at 8-1 for scan events 2-9, respectively |                                        |              |
| <b>HPLC Parameters and chromatography</b> |                          |                                                                                                       |                                        | <b>Notes</b> |
|                                           | <input type="checkbox"/> | Autosampler temperature                                                                               | 10C                                    |              |
|                                           | <input type="checkbox"/> | Column dimensions                                                                                     | 11-13 cm x 100 $\mu$ m*                |              |
|                                           | <input type="checkbox"/> | Precolumn dimensions                                                                                  | 2-4 cm x 100 $\mu$ m**                 |              |
|                                           | <input type="checkbox"/> | Column packing material                                                                               | Jupiter C18                            |              |
|                                           | <input type="checkbox"/> | Column temperature                                                                                    | Room temperature                       |              |
|                                           | <input type="checkbox"/> | Mobile phase A                                                                                        | 0.1% (v/v) formic acid in water        |              |
|                                           | <input type="checkbox"/> | Mobile phase B                                                                                        | 0.1% (v/v) formic acid in acetonitrile |              |
|                                           | <input type="checkbox"/> | Injection volume                                                                                      | 2.0 $\mu$ L                            |              |
|                                           | <input type="checkbox"/> | Injection loop (or needle) volume                                                                     | 8.0 $\mu$ L***                         |              |
|                                           | <input type="checkbox"/> | Flow rate for gradient                                                                                | 600 nL/min at column tip               |              |
|                                           | <input type="checkbox"/> | Flow rate for loading phase                                                                           | 1.2 uL/min                             |              |
|                                           | <input type="checkbox"/> | 184 min HPLC gradient for yeast samples                                                               | As per attached table                  |              |
|                                           | <input type="checkbox"/> | 95 min HPLC gradient for NCI20 and blanks samples                                                     | As per attached table                  |              |

\* Column length may vary depending upon the individual nanospray set up, but inner diameter should remain the same.

\*\* Precolumn is optional depending upon individual laboratory expertise, but should be used if at all possible. Column length may vary depending upon the individual nanospray set up, but inner diameter should remain the same.

\*\*\*If not possible, use same set up as dress rehearsal and make note of change.

| <b>184 min HPLC Gradient with “vented” column for yeast samples</b> |     |    |                    |            |       |
|---------------------------------------------------------------------|-----|----|--------------------|------------|-------|
| Time                                                                | %A  | %B | Flow path          | Flow rate  | Notes |
| 0                                                                   | 100 | 0  | To Waste*          | 1.2 uL/min |       |
| 0.01                                                                | 100 | 0  | To Waste           | 1.2 uL/min |       |
| 10                                                                  | 100 | 0  | To Waste           | 1.2 uL/min |       |
| 15                                                                  | 98  | 2  | To Waste           | 1.2 uL/min |       |
| 15.01                                                               | 98  | 2  | To column (source) | 600 nL/min |       |
| 135                                                                 | 60  | 40 | To column (source) | 600 nL/min |       |
| 150                                                                 | 10  | 90 | To column (source) | 600 nL/min |       |
| 155                                                                 | 10  | 90 | To column (source) | 600 nL/min |       |
| 159                                                                 | 10  | 90 | To column (source) | 600 nL/min |       |
| 164                                                                 | 95  | 5  | To column (source) | 600 nL/min |       |
| 169                                                                 | 100 | 0  | To column (source) | 600 nL/min |       |
| 184                                                                 | 100 | 0  | To column (source) | 600 nL/min |       |

\*If using a precolumn, the flow should be directed to waste.

| <b>95 min HPLC Gradient with “vented” column for blanks and NCI-20</b> |     |    |                    |            |       |
|------------------------------------------------------------------------|-----|----|--------------------|------------|-------|
| Time                                                                   | %A  | %B | Flow               | Flow rate  | Notes |
| 0                                                                      | 100 | 0  | To Waste*          | 1.2 uL/min |       |
| 0.01                                                                   | 100 | 0  | To Waste           | 1.2 uL/min |       |
| 10                                                                     | 100 | 0  | To Waste           | 1.2 uL/min |       |
| 15                                                                     | 98  | 2  | To Waste           | 1.2 uL/min |       |
| 15.01                                                                  | 98  | 2  | To column (source) | 600 nL/min |       |
| 50                                                                     | 75  | 25 | To column (source) | 600 nL/min |       |
| 65                                                                     | 10  | 90 | To column (source) | 600 nL/min |       |
| 70                                                                     | 10  | 90 | To column (source) | 600 nL/min |       |
| 74                                                                     | 10  | 90 | To column (source) | 600 nL/min |       |
| 75                                                                     | 95  | 5  | To column (source) | 600 nL/min |       |
| 80                                                                     | 100 | 0  | To column (source) | 600 nL/min |       |
| 95                                                                     | 100 | 0  | To column (source) | 600 nL/min |       |

\*If using a precolumn, the flow should be directed to waste.

## Run order:

This series of samples was run in **triplicate**. You may run the triplicate runs back-to-back or as three separate replicates with other samples or maintenance in between. If the series is run back-to-back, there is no need to run the Sample 1B (NCI20) two times in a row.

| <b>Run number</b> | <b>Sample</b>                                             | <b>Gradient</b>  |
|-------------------|-----------------------------------------------------------|------------------|
| 1                 | <b>Sample 1-B-NCI20</b>                                   | 95 min gradient  |
| 2                 | Wash*                                                     |                  |
| 3                 | Blank                                                     | 95 min gradient  |
| 4                 | <b>Sample 6-QC2 –Yeast only</b>                           | 184 min gradient |
| 5                 | Wash*                                                     |                  |
| 6                 | Blank                                                     | 95 min gradient  |
| 7                 | <b>Sample 6A - 0.25 fmol/uL<br/>Sigma 48 spiked yeast</b> | 184 min gradient |
| 8                 | Wash*                                                     |                  |
| 9                 | Blank                                                     | 95 min gradient  |
| 10                | <b>Sample 6B - 0.74 fmol/uL<br/>Sigma 48 spiked yeast</b> | 184 min gradient |
| 11                | Wash*                                                     |                  |
| 12                | Blank                                                     | 95 min gradient  |
| 13                | <b>Sample 6C - 2.2 fmol/uL<br/>Sigma 48 spiked yeast</b>  | 184 min gradient |
| 14                | Wash*                                                     |                  |
| 15                | Blank                                                     | 95 min gradient  |
| 16                | <b>Sample 6D - 6.7 fmol/uL<br/>Sigma 48 spiked yeast</b>  | 184 min gradient |
| 17                | Wash*                                                     |                  |
| 18                | Blank                                                     | 95 min gradient  |
| 19                | <b>Sample 6E - 20 fmol/uL<br/>Sigma 48 spiked yeast</b>   | 184 min gradient |
| 20                | Wash*                                                     |                  |
| 21                | Blank                                                     | 95 min gradient  |
| 22                | <b>Sample 6-QC1 - Sigma 48<br/>only</b>                   | 184 min gradient |
| 23                | Wash*                                                     |                  |
| 24                | Blank                                                     | 95 min gradient  |
| 25                | <b>Sample 1-B-NCI20</b>                                   | 95 min gradient  |

\* As per individual laboratory protocol

## D. Methods used by each laboratory in Study 8

| Thermo LTQ parameters            |              |              |              |
|----------------------------------|--------------|--------------|--------------|
|                                  | LTQ@73       | LTQ@65       | LTQ@95       |
| <b>Source/APstack parameters</b> |              |              |              |
| Capillary temperature            | 160°C        | 160°C        | 150°C        |
| Capillary voltage                | 46V          | 47 V         | 49V          |
| Tube Lens                        | 125V         | 110 V        | 120V         |
| Source voltage                   | 2.1kV        | 1.8 V        | 2.5kV        |
| <b>Tune File Parameters</b>      |              |              |              |
| Ion Trap Full Microscans         | 1            | 1            | 1            |
| Ion Trap MSn Microscans          | 1            | 1            | 1            |
| Ion Trap Full Max Ion Time       | 100ms        | 50ms         | 100ms        |
| Ion Trap MSn Max Ion Time        | 100ms        | 100ms        | 100ms        |
| Ion Trap Full AGC Target         | 30,000       | 30,000       | 30,000       |
| Ion Trap MSn AGC Target          | 10,000       | 10,000       | 1,000        |
| <b>MS detector</b>               |              |              |              |
| Acquire time (min)               | 172          | 184          | 184          |
| Start delay (min)                | 15           | 15           | 15           |
| Segments                         | 1            | 1            | 1            |
| Scan Events                      | 6            | 6            | 9            |
| Scan Range for Event 1           | 300-1600 m/z | 400-1600 m/z | 300-2000 m/z |
| Mass range for all events        | Normal       | Normal       | Normal       |
| Scan Rate for all events         | Normal       | Normal       | Normal       |
| Polarity for all events          | Positive     | Positive     | Positive     |
| Data type for MS scan            | Centroid     | Centroid     | Centroid     |
| Data Type for MSn Scan           | Centroid     | Centroid     | Centroid     |
| Additional microscans            | 0            | 0            | 0            |
| <b>Dynamic Exclusion</b>         |              |              |              |
| Repeat Count                     | 1            | 1            | 1            |
| Repeat duration (s)              | 30           | 1            | 0            |
| Exclusion list size              | 500          | 150          | 150          |
| Exclusion duration (s)           | 30           | 45           | 60           |
| Exclusion mass width             | By mass      | By mass      | By mass      |
| Exclusion mass width (low)       | 0.5          | 1            | 1.0          |
| Exclusion mass width (high)      | 2.5          | 2            | 3.5          |
| Early expiration is NOT used     | Not enabled  | Not enabled  | Not enabled  |

| <b>Scan Event</b>                                                                                     |                                                           |                                                           |                                                           |
|-------------------------------------------------------------------------------------------------------|-----------------------------------------------------------|-----------------------------------------------------------|-----------------------------------------------------------|
| Charge state screening and Rejection is NOT enabled                                                   | Not enabled                                               | Not enabled                                               | Not enabled                                               |
| Minimum MS signal Threshold for MS2 trigger                                                           | 1000                                                      | 1000                                                      | 500                                                       |
| Mass determined from scan event                                                                       | 1                                                         | 1                                                         | 1                                                         |
| Activation type                                                                                       | CID                                                       | CID                                                       | CID                                                       |
| Default charge state                                                                                  | 4                                                         | 4                                                         | 4                                                         |
| Isolation width (m/z)                                                                                 | 2                                                         | 2                                                         | 2                                                         |
| Normalized collision energy                                                                           | 30                                                        | 30                                                        | 28                                                        |
| Activation Q                                                                                          | 0.25                                                      | 0.25                                                      | 0.25                                                      |
| Activation time (ms)                                                                                  | 30                                                        | 30                                                        | 30                                                        |
| Mass lists and global mass lists NOT used                                                             | TRUE                                                      | TRUE                                                      | TRUE                                                      |
| Wideband Activation NOT used                                                                          | TRUE                                                      | TRUE                                                      | TRUE                                                      |
| For each Current Scan Event, the Nth most intense ion is set at 8-1 for scan events 2-9, respectively | Nth most intense at 5-1 for scan events 2-6, respectively | Nth most intense at 1-5 for scan events 2-6, respectively | Nth most intense at 8-1 for scan events 2-9, respectively |
| <b>HPLC Parameters and chromatography</b>                                                             |                                                           |                                                           |                                                           |
| LC instrument make and model                                                                          | Agilent 1100 nano                                         | Eksigent NanoLC 1D Plus                                   | Agilent G2226A Nanopump                                   |
| Autosampler temperature                                                                               | 10°C                                                      | 10°C                                                      | 10°C                                                      |
| Column dimensions                                                                                     | 15 cm x 100 um id                                         | 11 cm x 100 um id                                         | 12cm x 100um id                                           |
| Precolumn dimensions                                                                                  | 15 cm x 100 um                                            | 4 cm x 100 um                                             | 4 cm x 100 um                                             |
| Column packing material                                                                               | Chromolith CapRod Monolithic C18                          | Jupiter C18, 5 micron                                     | Jupiter C18, 5 micron                                     |
| Column temperature                                                                                    | Room temp                                                 | Room temp                                                 | Room temp                                                 |
| Mobile phase A                                                                                        | 0.1% (v/v) formic acid in water                           | 0.1% (v/v) formic acid in water                           | 0.1% (v/v) formic acid in water                           |
| Mobile phase B                                                                                        | 0.1% (v/v) formic acid in acetonitrile                    | 0.1% (v/v) formic acid in acetonitrile                    | 0.1% (v/v) formic acid in acetonitrile                    |
| Injection volume                                                                                      | 2 uL                                                      | 5 uL                                                      | 2uL                                                       |
| Injection loop (or needle) volume                                                                     | 2 uL                                                      | 10 uL                                                     | 8uL                                                       |
| Flow rate for gradient                                                                                | 600 nL/min                                                | 600nL/min                                                 | 600nL/min                                                 |
| Flow rate for loading phase                                                                           | 1.2 uL/min                                                | 1.2 uL/min                                                | 1.2 uL/min                                                |
| HPLC gradient                                                                                         | As per attached table                                     | As per attached table                                     | As per attached table                                     |

## LC Gradient

### LTQ@73

| 184 min SOP Gradient |     |    |            | 120 min Deviation Gradient |    |    |           |       |
|----------------------|-----|----|------------|----------------------------|----|----|-----------|-------|
| Time                 | %A  | %B | Flow rate  | Time                       | %A | %B | Flow rate | Notes |
| 0                    | 100 | 0  | 1.2 uL/min | 0                          |    |    |           |       |
| 0.01                 | 100 | 0  | 1.2 uL/min |                            |    |    |           |       |
| 10                   | 100 | 0  | 1.2 uL/min |                            |    |    |           |       |
| 15                   | 98  | 2  | 1.2 uL/min | 15                         |    |    |           |       |
| 15.01                | 98  | 2  | 600 nL/min |                            |    |    |           |       |
| 135                  | 60  | 40 | 600 nL/min |                            |    |    |           |       |
| 150                  | 10  | 90 | 600 nL/min |                            | 10 | 90 |           |       |
| 155                  | 10  | 90 | 600 nL/min |                            | 10 | 90 |           |       |
| 159                  | 10  | 90 | 600 nL/min |                            |    |    |           |       |
| 164                  | 95  | 5  | 600 nL/min |                            |    |    |           |       |
| 169                  | 100 | 0  | 600 nL/min |                            |    |    |           |       |
| 184                  | 100 | 0  | 600 nL/min |                            |    |    |           |       |

### LTQ@65

| 184 min SOP Gradient |     |    |            | 184 min Deviation Gradient |    |    |            |       |
|----------------------|-----|----|------------|----------------------------|----|----|------------|-------|
| Time                 | %A  | %B | Flow rate  | Time                       | %A | %B | Flow rate  | Notes |
| 0                    | 100 | 0  | 1.2 uL/min |                            |    |    | 1.5 uL/min |       |
| 0.01                 | 100 | 0  | 1.2 uL/min |                            |    |    | 1.5 uL/min |       |
| 10                   | 100 | 0  | 1.2 uL/min |                            |    |    | 1.5 uL/min |       |
| 15                   | 98  | 2  | 1.2 uL/min |                            |    |    | 1.5 uL/min |       |
| 15.01                | 98  | 2  | 600 nL/min |                            |    |    |            |       |
| 135                  | 60  | 40 | 600 nL/min |                            |    |    |            |       |
| 150                  | 10  | 90 | 600 nL/min |                            |    |    |            |       |
| 155                  | 10  | 90 | 600 nL/min |                            |    |    |            |       |
| 159                  | 10  | 90 | 600 nL/min |                            |    |    |            |       |
| 164                  | 95  | 5  | 600 nL/min |                            |    |    |            |       |
| 169                  | 100 | 0  | 600 nL/min |                            |    |    |            |       |
| 184                  | 100 | 0  | 600 nL/min |                            |    |    |            |       |

### LTQ@95

| 184 min HPLC Gradient with "vented" column for yeast samples |    |    |                    |            |                                      |
|--------------------------------------------------------------|----|----|--------------------|------------|--------------------------------------|
| Time                                                         | %A | %B | Flow path          | Flow rate  | Notes                                |
| 0                                                            | 97 | 3  | To Waste*          | 5 uL/min   | Second Pump to precolumn             |
| 15                                                           | 97 | 3  | To Waste           | 5 uL/min   | Second Pump to precolumn             |
| 135                                                          | 60 | 40 | To column (source) | 600 nL/min | Nano pump to pre & Analytical Column |
| 150                                                          | 10 | 90 | To column (source) | 600 nL/min |                                      |
| 155                                                          | 10 | 90 | To column (source) | 600 nL/min |                                      |
| 159                                                          | 10 | 90 | To column (source) | 600 nL/min |                                      |
| 164                                                          | 95 | 5  | To column (source) | 600 nL/min |                                      |
| 169                                                          | 97 | 3  | To column (source) | 600 nL/min |                                      |
| 184                                                          | 97 | 3  | To column (source) | 600 nL/min |                                      |



| <b>Thermo Orbitrap parameters</b> |                                  |                                |                |
|-----------------------------------|----------------------------------|--------------------------------|----------------|
|                                   | <b>Orbi@56</b>                   | <b>Orbi@86</b>                 | <b>Orbi@65</b> |
| <b>Source/APstack parameters</b>  |                                  |                                |                |
| Capillary temperature             | 150°C                            | 160°C                          | 160°C          |
| Capillary voltage                 | 48V                              | 46V                            | 43V            |
| Tube Lens                         | 100V                             | 110V                           | 100V           |
| Source voltage                    | 2.0V                             | 1.85V                          | 1.9V           |
| <b>Tune File Parameters</b>       |                                  |                                |                |
| FTMS Full Microscans              | 1                                | 1                              | 1              |
| Ion Trap MSn Microscans           | 1                                | 1                              | 1              |
| FTMS Full Max Ion Time            | 500                              | 750                            | 1000           |
| Ion Trap MSn Max Ion Time         | 100                              | 100                            | 100            |
| FTMS Full AGC Target              | 1,000,000                        | 1,000,000                      | 1,000,000      |
| Ion Trap MSn AGC Target           | 10,000                           | 10,000                         | 10,000         |
| <b>MS detector</b>                |                                  |                                |                |
| Acquire time (min)                | 135                              | 180                            | 184            |
| Start delay (min)                 | 15                               | 0                              | 15             |
| Segments                          | 1                                | 1                              | 1              |
| Scan Events                       | 9                                | 10                             | 6              |
| Scan Range for Event 1            | 350-1800 m/z                     | 300-2000 m/z                   | 350-1600 m/z   |
| Mass range for all events         | Normal                           | Normal                         | Normal         |
| Scan Rate for all events          | Normal                           | Normal                         | Normal         |
| Polarity for all events           | Positive                         | Positive                       | Positive       |
| Data type for MS scan             | Profile                          | Profile                        | Profile        |
| Data Type for MSn Scan            | Centroid                         | Centroid                       | Centroid       |
| Additional microscans             | 0                                | 0                              | 0              |
| Resolution of MS scan             | 60,000                           | 60,000                         | 60,000         |
| Lock mass is NOT enabled          | True                             | False                          | True           |
| <b>Dynamic Exclusion</b>          |                                  |                                |                |
| Repeat Count                      | 1                                | 1                              | 1              |
| Repeat duration (s)               | 0                                | 30                             | 0              |
| Exclusion list size               | 500                              | 500                            | 150            |
| Exclusion duration (s)            | 60                               | 50                             | 45             |
| Exclusion mass width              | Relative to reference mass (ppm) | Relative to ppm of parent mass | By mass        |
| Exclusion mass width (low)        | 25 ppm                           | 15 ppm                         | 0.6 m/z        |
| Exclusion mass width (high)       | 25 ppm                           | 20 ppm                         | 0.6 m/z        |

|                                                                                                       |                                            |                                                                    |                                                                   |
|-------------------------------------------------------------------------------------------------------|--------------------------------------------|--------------------------------------------------------------------|-------------------------------------------------------------------|
| Early expiration is NOT used                                                                          | True                                       | True                                                               | True                                                              |
| Charge state screening and Rejection is enabled                                                       | True                                       | True                                                               | True                                                              |
| Monoisotopic precursor selection enabled                                                              | True                                       | True                                                               | True                                                              |
| Non-peptide monoisotopic recognition enabled                                                          | True                                       | True                                                               | True                                                              |
| Charge state +1 rejected                                                                              | True                                       | True                                                               | True                                                              |
| Unassigned charge state rejected                                                                      | True                                       | True                                                               | True                                                              |
| <b>Scan Event</b>                                                                                     |                                            |                                                                    |                                                                   |
|                                                                                                       |                                            |                                                                    |                                                                   |
| Minimum MS signal Threshold for MS2 trigger                                                           | 500                                        | 5000                                                               | 1000                                                              |
| Mass determined from scan event                                                                       | 1                                          | 1                                                                  | 1                                                                 |
| Activation type                                                                                       | CID                                        | CID                                                                | CID                                                               |
| Default charge state                                                                                  | 4                                          | 3                                                                  | 4                                                                 |
| Isolation width (m/z)                                                                                 | 2.0                                        | 2.0                                                                | 2.0                                                               |
| Normalized collision energy                                                                           | 28                                         | 28                                                                 | 30                                                                |
| Activation Q                                                                                          | .250                                       | .250                                                               | .250                                                              |
| Activation time (ms)                                                                                  | 30                                         | 30                                                                 | 30                                                                |
| Mass lists and global mass lists NOT used                                                             | True                                       | True                                                               | True                                                              |
| Wideband Activation NOT used                                                                          | True                                       | True                                                               | True                                                              |
| For each Current Scan Event, the Nth most intense ion is set at 8-1 for scan events 2-9, respectively | True                                       | Nth most intense ion set at 1-9 for scan events 2-10, respectively | Nth most intense ion set at 1-5 for scan events 2-6, respectively |
| <b>HPLC Parameters and chromatography</b>                                                             |                                            |                                                                    |                                                                   |
| Autosampler temperature                                                                               | 10°C                                       | 10°C                                                               | 10°C                                                              |
| Column dimensions                                                                                     | 12 cm x 75um ID                            | 15 cm x 75 um                                                      | 11-13 cm x 100um                                                  |
| Precolumn dimensions                                                                                  | n/a                                        | n/a                                                                | 4 cm x 100 um                                                     |
| Column packing material                                                                               | Reprosil C18AQ 3um                         | Reprosil C18AQ 3um                                                 | Jupiter C18 5um                                                   |
| Column temperature                                                                                    | Room temp                                  | Room temp                                                          | Room temp                                                         |
| Mobile phase A                                                                                        | 0.1% (v/v) formic acid in water            | 0.1% (v/v) formic acid in water                                    | 0.1% (v/v) formic acid in water                                   |
| Mobile phase B                                                                                        | 0.1% (v/v) formic acid in 90% acetonitrile | 50% (v/v) acetonitrile, 0.1% formic acid                           | 0.1% (v/v) formic acid in acetonitrile                            |
| Injection volume                                                                                      | 2.0 uL                                     | 2.0 uL                                                             | 2.0 uL                                                            |

|                                   |                       |                       |                          |
|-----------------------------------|-----------------------|-----------------------|--------------------------|
| Injection loop (or needle) volume | 8.0 uL                | 10 uL                 | 10 uL                    |
| Flow rate for gradient            | 200 nL/min            | 400 nL/min            | 600 nL/min at column tip |
| Flow rate for loading phase       | 700 nL/min            | 1.0 uL/min            | 1.2 uL/min               |
| HPLC gradient                     | As per attached table | As per attached table | As per attached table    |

## LC Gradient for Thermo LTQ-Orbitraps

Orbi@56

| 184 min SOP Gradient |     |    |            | 133 min Deviation Gradient |    |    |            |                               |
|----------------------|-----|----|------------|----------------------------|----|----|------------|-------------------------------|
| Time                 | %A  | %B | Flow rate  | Time                       | %A | %B | Flow rate  | Notes                         |
| 0                    | 100 | 0  | 1.2 uL/min | 0                          | 97 | 3  | 700 nL/min | 3.5x elution flow rate        |
| 0.01                 | 100 | 0  | 1.2 uL/min | 13                         | 97 | 3  | 700 nL/min |                               |
| 10                   | 100 | 0  | 1.2 uL/min | 14                         | 95 | 5  | 700 nL/min |                               |
| 15                   | 98  | 2  | 1.2 uL/min | 15                         | 95 | 5  | 200 nL/min | Same load time as SOP         |
| 15.01                | 98  | 2  | 600 nL/min |                            |    |    |            |                               |
| 135                  | 60  | 40 | 600 nL/min | 105                        | 65 | 35 | 200 nL/min | Same slope as SOP 0.33% B/min |
| 150                  | 10  | 90 | 600 nL/min | 115                        | 10 | 90 | 200 nL/min |                               |
| 155                  | 10  | 90 | 600 nL/min | 124                        | 10 | 90 | 200 nL/min |                               |
| 159                  | 10  | 90 | 600 nL/min |                            |    |    |            |                               |
| 164                  | 95  | 5  | 600 nL/min | 125                        | 97 | 3  | 700 nL/min | 3.5x elution flow rate        |
| 169                  | 100 | 0  | 600 nL/min |                            |    |    |            |                               |
| 184                  | 100 | 0  | 600 nL/min | 133                        | 97 | 3  | 700 nL/min |                               |

Orbi@86

| 3hr HPLC Gradient with "vented" column for yeast samples |    |    |                    |            |                                     |
|----------------------------------------------------------|----|----|--------------------|------------|-------------------------------------|
| Time                                                     | %A | %B | Flow path          | Flow rate  | Notes                               |
| 0                                                        | 50 | 50 | To Waste*          | 1.0 uL/min | Channel 1 on (mobA=mob= 0.1%formic) |
| 22                                                       | 50 | 50 | To Waste           | 1.0 uL/min | Channel 1 off, channel 2 on         |
| 0                                                        | 99 | 1  | To column (source) | 400 nL/min | Time 0, MS trigger from channel 2   |
| 2                                                        | 99 | 1  | To column (source) | 400 nL/min |                                     |
| 160                                                      | 20 | 80 | To column (source) | 400 nL/min |                                     |
| 161                                                      | 2  | 98 | To column (source) | 400 nL/min |                                     |
| 180                                                      | 2  | 98 | To column (source) | 400 nL/min |                                     |

| Wash Gradient |    |    |                    |            |                                      |
|---------------|----|----|--------------------|------------|--------------------------------------|
| Time          | %A | %B | Flow path          | Flow rate  | Notes                                |
| 0             | 50 | 50 | To Waste*          | 1.0 uL/min | Channel 1 on, full loop inj 100% ACN |
| 20            | 50 | 50 | To Waste           | 1.0 uL/min | Channel 1 off, channel 2 on          |
| 0             | 90 | 10 | To column (source) | 400 nL/min | Time 0, MS trigger from channel 2    |
| 5             | 10 | 90 | To column (source) | 400 nL/min |                                      |
| 20            | 10 | 90 | To column (source) | 400 nL/min |                                      |

| Equilibration Gradient |    |    |                    |            |                                        |
|------------------------|----|----|--------------------|------------|----------------------------------------|
| Time                   | %A | %B | Flow path          | Flow rate  | Notes                                  |
| 0                      | 50 | 50 | To Waste*          | 1.0 uL/min | Channel 1 on, full loop inj 100% water |
| 25                     | 50 | 50 | To Waste           | 1.0 uL/min | Channel 1 off, channel 2 on            |
| 0                      | 99 | 1  | To column (source) | 400 nL/min | Time 0, MS trigger from channel 2      |
| 10                     | 99 | 1  | To column (source) | 400 nL/min |                                        |

Orbi@65

| 184 min SOP Gradient |     |    |            | 189 min Deviation Gradient |    |    |           |                                                         |
|----------------------|-----|----|------------|----------------------------|----|----|-----------|---------------------------------------------------------|
| Time                 | %A  | %B | Flow rate  | Time                       | %A | %B | Flow rate | Notes                                                   |
| 0                    | 100 | 0  | 1.2 uL/min | 0                          |    |    |           |                                                         |
| 0.01                 | 100 | 0  | 1.2 uL/min |                            |    |    |           |                                                         |
| 10                   | 100 | 0  | 1.2 uL/min |                            |    |    |           |                                                         |
| 15                   | 98  | 2  | 1.2 uL/min | 20                         |    |    |           | Flow diverted to waste for only 1 <sup>st</sup> 15 min. |
| 15.01                | 98  | 2  | 600 nL/min | 20.01                      |    |    |           |                                                         |
| 135                  | 60  | 40 | 600 nL/min | 140                        |    |    |           |                                                         |
| 150                  | 10  | 90 | 600 nL/min | 155                        |    |    |           |                                                         |
| 155                  | 10  | 90 | 600 nL/min | 160                        |    |    |           |                                                         |
| 159                  | 10  | 90 | 600 nL/min | 164                        |    |    |           |                                                         |
| 164                  | 95  | 5  | 600 nL/min | 169                        |    |    |           |                                                         |
| 169                  | 100 | 0  | 600 nL/min | 174                        |    |    |           |                                                         |
| 184                  | 100 | 0  | 600 nL/min | 189                        |    |    |           |                                                         |

## E. Sigma UPS1 Proteins

[http://www.sigmaaldrich.com/catalog/ProductDetail.do?N4=UPS1|SIGMA&N5=Product%20No.|BRAND\\_KEY&F=SPEC](http://www.sigmaaldrich.com/catalog/ProductDetail.do?N4=UPS1|SIGMA&N5=Product%20No.|BRAND_KEY&F=SPEC)

1. Alpha-lactalbumin
2. Annexin A5
3. Antithrombin-III
4. Beta-2-microglobulin
5. BH3 interacting domain death agonist [BID]
6. Carbonic anhydrase 1
7. Carbonic anhydrase 2
8. Catalase
9. Cathepsin D
10. Cathepsin G
11. Complement C5 [Complement C5a]
12. C-reactive protein
13. Creatine kinase M-type [CK-MM]
14. Cytochrome b5
15. Cytochrome c [Apocytochrome c]
16. Epidermal growth factor
17. Fatty acid-binding protein
18. Gelsolin
19. Glutathione S-transferase A1 [GST A1-1]
20. Glutathione S-transferase P [GST]
21. GTPase HRas [Ras protein]
22. Hemoglobin alpha chain
23. Hemoglobin beta chain
24. Histidyl-tRNA synthetase [Jo-1]
25. Insulin-like growth factor II
26. Interleukin-8
27. Lactotransferrin
28. Leptin
29. Lysozyme C
30. Microtubule-associated protein tau [Tau protein]
31. Myoglobin
32. NAD(P)H dehydrogenase [quinone] 1 [DT Diaphorase]
33. Neddylin [Nedd8]
34. Peptidyl-prolyl cis-trans isomerase A [Cyclophilin A]
35. Peroxiredoxin 1
36. Platelet-derived growth factor B chain
37. Retinol-binding protein
38. Ribosyl-dihydro-nicotinamide dehydrogenase (quinone) [Quinone oxidoreductase 2 or NQO2]
39. Serotransferrin [Apo-transferrin]
40. Serum albumin
41. Small ubiquitin-related modifier 1 [SUMO-1]
42. Superoxide dismutase [Cu-Zn]
43. Thioredoxin
44. Tumor necrosis factor [TNF-alpha]
45. Ubiquitin
46. Ubiquitin-conjugating enzyme E2 I [UbcH9]
47. Ubiquitin-conjugating enzyme E2 C [UbcH10]
48. Ubiquitin-conjugating enzyme E2 E1 [UbcH6]

## F. NCI-20

This is a mixture of 20 proteins (shown below) assembled by NIST for LC-MS studies.

| <b>Protein</b>                                                 | <b>Commercial Source</b>    | <b>Catalog Number</b> |
|----------------------------------------------------------------|-----------------------------|-----------------------|
| Albumin                                                        | New Century Pharmaceuticals | 9801                  |
| Fibrinogen                                                     | Innovative Research         | IFIB                  |
| Transferrin                                                    | Hyphen Biomed               | PP002A                |
| $\beta$ -2-microglobulin                                       | BioWorld                    | 507410                |
| C-reactive protein                                             | CalBiochem                  | 475828                |
| Gastrin                                                        | CalBiochem                  | 236608                |
| transferrin receptor                                           | Anaspec                     | 20750                 |
| Vascular                                                       | Research Diagnostics, Inc.  | RDI-SCP185-3          |
| Endothelial Growth Factor                                      |                             | 293-VE-050/CF         |
| Insulin-like growth factor I                                   | R & D Systems               |                       |
| Prolactin                                                      | Affinity Bioreagents        | ORP-16035             |
| $\alpha$ -fetoprotein                                          | Cell Sciences               | CRB001B               |
| Carcinoembryonic antigen                                       | Cell Sciences               | CRA010                |
| Calcitonin                                                     | BioWorld                    | 509225                |
| Prostate specific antigen/ $\alpha$ 1-antichymotrypsin complex | Anaspec                     | 20673                 |
| Thyroglobulin                                                  | Fitzgerald Industries       | 30-AP13               |
| Granulocyte macrophage colony stimulating factor               | Fitzgerald Industries       | 30-AT01               |
| Tumor necrosis factor- $\alpha$                                | Cell Sciences               | CRG103B               |
| Interleukin-2                                                  | Cell Sciences               | CRT100B               |
| Interleukin-6                                                  | Cell Sciences               | CRI100B               |
| Erythropoietin                                                 | Biomyx                      | I1005-200             |
|                                                                | Cell Sciences               | CRE600B               |





### MS1 ion injection (MS1-1)

The MS1 ion injection time (ms) can be used as a measure of the available signal. The smaller the number the more signal is available. Time outs (typically 100ms) are reached if the total signal does not reach a threshold value. Therefore median MS1 injection times close to the maximum indicate below optimal signal.

### MS1 S/N (MS1-2A)

MS1 signal-to-noise (S/N) is calculated by dividing the maximum peak intensity by the median peak intensity. MS1 S/N is a better indicator of signal strength than TIC because S/N values because absolute signal levels between instruments are not easily compared. A reduction in MS1 S/N would negatively affect the probability for peptide identification in general.

### MS2 S/N (MS2-3)

MS2 S/N is calculated the same as MS1-2A. Since MS2 signal levels are generally 10X lower than MS1 signal levels, MS2 S/N is also a good indicator of signal strength.

### Unique tryptic peptide IDs (P-2C)

The number of unique tryptic peptides is a key performance metric and is calculated by summing the total unique peptide sequences with scores above a 1% FDR threshold. Peptide identifications were made using SpectraST (Lam et al). FDRs were calculated using a peptide spectral library from an unrelated species. The yeast spectral library used in this work was generated from hundreds of repeat runs of the CPTAC yeast reference proteome and is available for download at <http://peptide.nist.gov>.

The software pipeline used to calculate these and the full set of QC metrics is available for download at <http://peptide.nist.gov>.

## H. Interpretation and Calculation of CN50 for Studies 6 & 8

The CN50 for each run from each instrument in study is shown in the Table below.

|                      | Study 6 (unspiked yeast) |       |       |       |       | Study 8 (120 ng) |       |       |       |       | Study 8 (600 ng) |       |       |       |      |
|----------------------|--------------------------|-------|-------|-------|-------|------------------|-------|-------|-------|-------|------------------|-------|-------|-------|------|
|                      | run 1                    | run 2 | run 3 | mean  | CV    | run 1            | run 2 | run 3 | mean  | CV    | run 1            | run 2 | run 3 | mean  | CV   |
| LTQ@73               | 34147                    | 36502 | 35773 | 35474 | 3.4%  | 27690            | 25976 | 25182 | 26282 | 4.9%  | 18369            | 17485 | 18263 | 18039 | 2.7% |
| LTQ2@95              | 42969                    | 45309 | 43631 | 43969 | 2.7%  | 67762            | 56760 | 51446 | 58656 | 14.2% | 28142            | 26730 | 27377 | 27416 | 2.6% |
| LTQ-XLx@65           | 38882                    | 46758 | 38126 | 41256 | 11.6% | 46734            | 44931 | 40807 | 44157 | 6.9%  | 21782            | 21566 | 23831 | 22393 | 5.6% |
| <b>All LTQs</b>      | 40233                    |       |       |       |       | 43032            |       |       |       |       | 22616            |       |       |       |      |
| LTQ-OrbitrapO@65     | 17303                    | 18142 | 19207 | 18217 | 5.2%  | 22893            | 22608 | 22343 | 22615 | 1.2%  | 17695            | 18265 | 17919 | 17959 | 1.6% |
| LTQ-XL-OrbitrapP@65  | 20370                    | 23944 | 21016 | 21777 | 8.7%  | NA               | NA    | NA    | NA    | NA    | NA               | NA    | NA    | NA    | NA   |
| LTQ-Orbitrap@86      | 36117                    | 26508 | 28433 | 30353 | 16.7% | 18180            | 17813 | 18485 | 18159 | 1.9%  | 17903            | 17358 | 17951 | 17738 | 1.9% |
| LTQ-OrbitrapW@56     | 23620                    | 25455 | 26109 | 25061 | 5.1%  | 15295            | 15312 | 15309 | 15305 | 0.1%  | 14064            | 13659 | 13245 | 13656 | 3.0% |
| <b>All Orbitraps</b> | 23852                    |       |       |       |       | 18693            |       |       |       |       | 16451            |       |       |       |      |

The copy number at 50% detection (CN50) is a summary measure of the depth of sampling for the yeast proteome. This statistic makes use of the TAP copy number measurements(5) and a list of detected yeast proteins to estimate the copy number at which a randomly selected protein has 50% probability of detection in a single LC-MS/MS run. Smaller CN50 values denote more extensive sampling of the yeast proteome, and better performance. Many factors influence a specific protein's detection by LC-MS/MS; copy number is just one such factor. We consider CN50 to be a summary measure of the performance of an instrument platform. The following section describes calculation of CN50. In addition, example code for the R language (<http://www.R-project.org>) demonstrates this calculation.

CN50 is computed via logistic regression. Observations (the Y values) are binary responses for each yeast ORF denoting whether that protein is observed in an LC-MS/MS run. These binary observations are regressed against the logarithm (base 10) of the TAP copy numbers. The log transformation is used to improve model fit. The results of this regression are estimated intercept ( $a$ ) and slope ( $b$ ) coefficients. Given the coefficients and the logistic regression equation, one may set the probability of detection equal to 0.5, and algebraically solve for the corresponding copy number (log 10 scale). This solution is easily shown to be  $-a/b$ . Raising 10 to the power of this ratio ( $10^{-a/b}$ ) results in an estimate of the CN50 on the copy number scale. Thus, CN50 summarizes the detection of yeast proteins, as a function of copy number, for each LC-MS/MS run. Note that since the logistic regression uses log 10 of copy number as the independent variable, the statistical properties of the slope and intercept coefficients (and subsequently their ratio) are better behaved on this scale. The antilog transformation is performed to aid interpretation of CN50. Finally, note that the TAP copy numbers(5) include measurement error. This uncertainty in a regressor is known as the "errors in variables" problem, and leads to a bias in estimation of the regression coefficients. In this use of logistic regression to construct the CN50, all LC-MS/MS runs are affected equally by this phenomenon. The bias is believed to be relatively small in this application, and does not significantly affect the comparison of platforms' performance.

The remainder of this section outlines computation of CN50 for an LC-MS/MS run using the R programming language. TAP copy number data are available in the supplementary material of Ghaemmaghami, *et al*(5). Lines beginning with hash marks (##) denote comments explaining the ensuing steps. The calculation assumes that the TAP copy number data have been merged with protein detection data with yeast ORF as the merge key. The variables used in the calculation are defined as follows:

$N$ : the number of yeast proteins in the data set

$Y$ : the  $N \times 1$  vector of binary indicators of detection for yeast proteins, 0-non detected; 1-detected

$copy$ : the  $N \times 1$  vector of TAP copy numbers (copies per cell)

R code:

## The copy vector includes values of '-', '%,' and '#', as well as measured values of molecules per cell.

## '-' indicates no detected expression, '%' indicates a detected band that is below the limit of quantitation

## (50 copies /cell), and '#' indicates a detected band that was unquantifiable due to experimental problems

```
## with the Western blot. These values were coded as -1 before reading into R. Because these are
## unmeasured proteins (possibly not expressed), they are not useful in evaluating the relationship between
## copy number and protein detection. In this analysis they are re-coded as missing.
copy[copy < 1] <- NA

## take the logarithm
copy.log10 <- log10(copy)

## compute the logistic regression and save the coefficients to an object named 'fit.coef'
fit.coef <- glm( Y ~ copy.log10, family="binomial")$coef

## compute the CN50 on log10 scale, and on original copy number scale
CN50.log10 <- - fit.coef[1, 1] / fit.coef[1, 2]
CN50 <- 10^(CN50.log10)
```

# I. Correction of chromatography issue diagnosed by Performance Metrics.

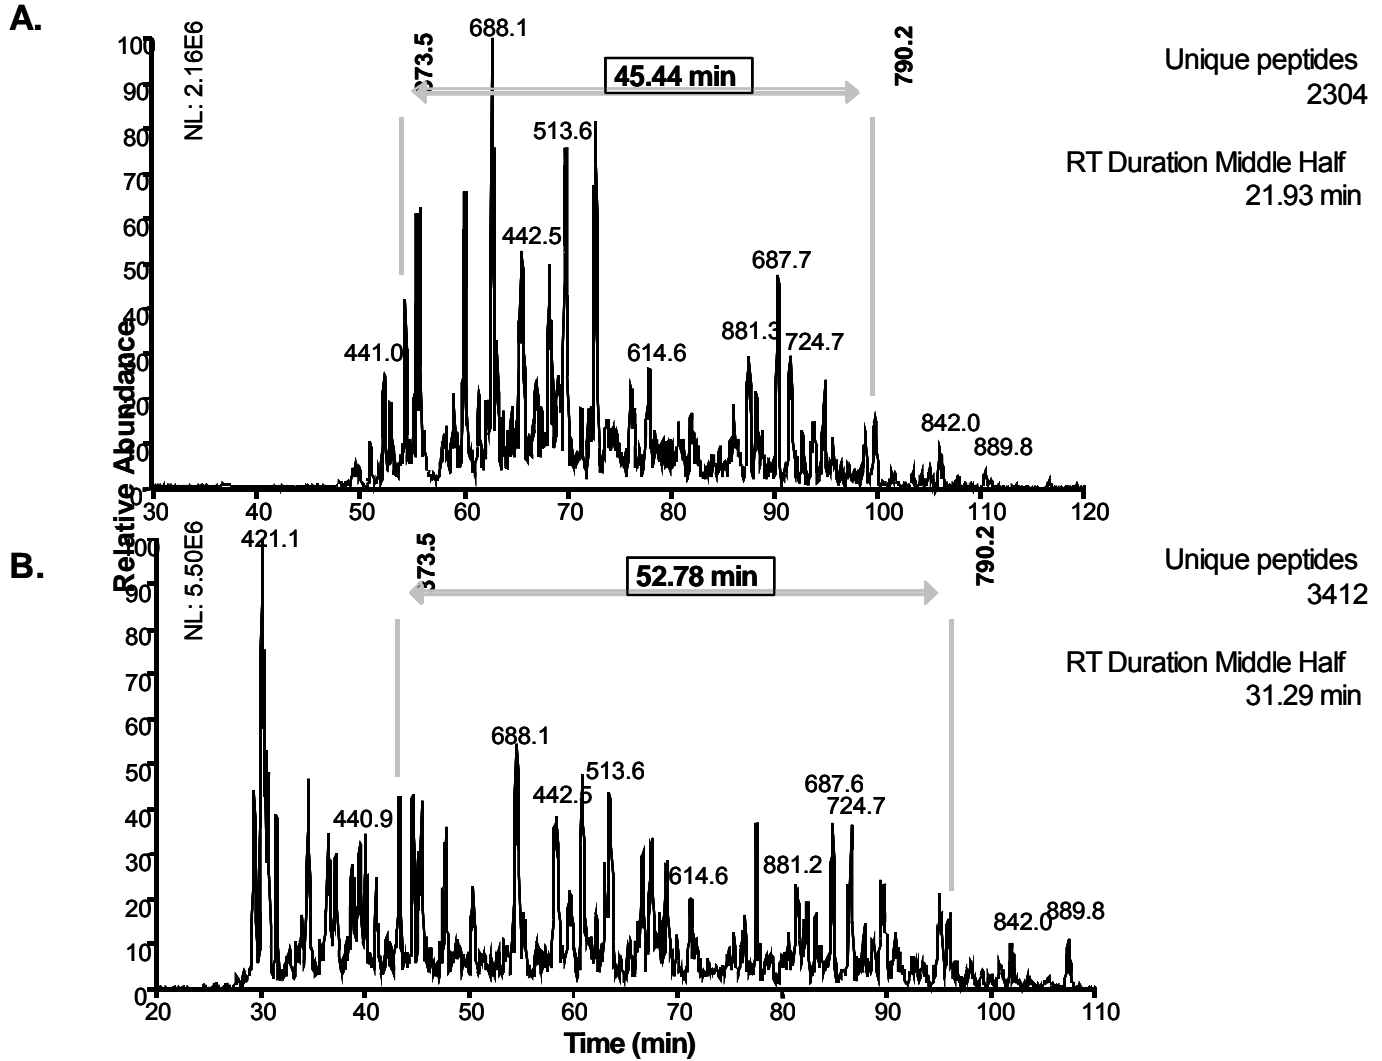

Example of the utility of the performance metrics to help troubleshoot a performance issue. A) Base peak chromatogram of yeast lysate digest. Note that the retention time difference between two peaks in the chromatogram,  $m/z$  373.5 and  $m/z$  790.2, is 45.4 minutes, which was significantly shorter compared to other instruments in the study. B) Base peak chromatogram of yeast lysates digest following repair of pump seal, replacement of pump check valve, manual recalibration of flow rate, and adjusting sample loading to lower flow rate. The retention time duration for the middle half of peptides increased along with the number of unique peptide identifications.

## **J. INSTRUMENT PARAMETERS FOR STUDIES 6 AND 8**

Study

Study 6 'Yeast + Sigma48'

|                  |                 |                 |           |              |         |      |
|------------------|-----------------|-----------------|-----------|--------------|---------|------|
| Site             | 65              | 56              | 86        | 65           | 73      | 95   |
| Instrument       | OrbitrapP       | OrbitrapO       | OrbitrapW | Orbitrap     | LTQ-XLx | LTQ  |
| Instrument model | LTQ-XL-Orbitrap | LTQ-Orbitrap    | LTQ       | LTQ-Orbitrap | LTQ     | LTQ2 |
| Parameter        | Units           | Suggested Range | SOP Value |              |         |      |

Sample Handling

|               |   |            |     |     |     |     |     |     |     |
|---------------|---|------------|-----|-----|-----|-----|-----|-----|-----|
| Storage Temp. | C | -20 or -80 | -20 | -20 | -80 | -80 | -20 | -80 | -80 |
|---------------|---|------------|-----|-----|-----|-----|-----|-----|-----|

Comments on samples

Chromatography

|                                |                |                |                      |               |                |               |                 |
|--------------------------------|----------------|----------------|----------------------|---------------|----------------|---------------|-----------------|
| HPLC Manufacturer              | Eksigent       | Eksigent       | Agilent              | Eksigent      | Eksigent       | Agilent       | Agilent         |
| HPLC Model                     | NanoLC 1D plus | NanoLC 1D plus | 1100 Nanopump G2226A | 2D nano       | NanoLC 1D plus | 1100 nano     | G2226A Nanopump |
| autosampler manufacturer       | Eksigent       | Eksigent       | Agilent              | Spark Holland | Eksigent       | Spark Holland | Agilent         |
| autosampler model              | NanoLC-AS1     | NanoLC-AS1     | 1100 MicroWPS G1377A | Endurance     | NanoLC-AS1     | Endurance     | G1377A u-WPS    |
| pre-column used                | Y              | Y              | N                    | N             | Y              | Y             | Y               |
| pre-column is vented           | Y              | Y              | N                    | N/A           | Y              | Y             | Y               |
| pre-column length              | cm             | 4              | N/A                  | N/A           | 4              | 4             | 4               |
| pre-column ID                  | um             | 100            | N/A                  | N/A           | 100            | 100           | 100             |
| split-flow used                | Y/N            | N              | N                    | N             | N              | N             | N               |
| loading flowrate               | nl/min         | 1,200          | 1,200                | 1,200         | 1,500*         | 1,200         | 1,200           |
| flow-rate from pump            | nl/min         | 600            | 600                  | 600           | 600            | 600           | 600             |
| gradient per SOP               | Y/N            | Y*             | Y*                   | Y             | Y**            | Y             | Y               |
| first 15 min diverted to waste | Y/N            | Y              | N                    | Y             | Y              | Y             | Y               |

\*note - Due to the design of the 1Dplus HPLC pump, we could not run a gradient from 100-98% Mobile Phase A from 10-15 min. Instead we switched from 100% to 98% at 15 min.

\*note - Due to the design of the 1Dplus HPLC pump, we could not run a gradient from 100-98% Mobile Phase A from 10-15 min. Instead we switched from 100% to 98% at 15 min.

\*note - Due to problems getting reproducible results with the 8uL loop, the loop was changed to a 10 uL loop and the flow rate for the loading phase was changed such that the loop was flushed with at least two volumes before the gradient was started  
 \*\*note - Due to the design of the 1Dplus HPLC pump, we could not run a gradient from 100-98% Mobile Phase A from 10-15 min. Instead we switched from 100% to 98% at 15 min.

Wash runs

|                                    |     |   |   |   |   |   |   |   |
|------------------------------------|-----|---|---|---|---|---|---|---|
| short wash gradients run on column | Y/N | N | N | Y | Y | N | Y | Y |
| loop washed                        | Y/N | Y | Y | Y | Y | Y | Y | Y |
| comments on wash steps             |     |   |   |   |   |   |   |   |

Columns

|                           |                              |                              |      |     |                              |     |     |
|---------------------------|------------------------------|------------------------------|------|-----|------------------------------|-----|-----|
| manufacturer              | Self made with Jupiter resin | Self made with Jupiter resin | self | N/A | Self made with Jupiter resin | N/A |     |
| packing per SOP           | Y                            | Y                            | Y    | Y   | Y                            | Y   | Y   |
| packing finished on HPLC  | Y                            | Y                            | Y    | Y   | Y                            | Y   | Y   |
| analytical column length  | cm                           | 11                           | 11   | 12  | 13                           | 11  | 13  |
| analytical column ID      | um                           | 100                          | 100  | 100 | 100                          | 100 | 100 |
| other comments on columns |                              |                              |      |     |                              |     |     |

Nano Spray/ AP Stack parameters

|                          |           |           |                                                        |                        |           |        |            |
|--------------------------|-----------|-----------|--------------------------------------------------------|------------------------|-----------|--------|------------|
| source manufacturer      | Thermo    | Thermo    | James A. Hill Instrument Services                      | Jamie Hill Instruments | Thermo    | Thermo | In House   |
| source model             | NanoSpray | NanoSpray | LTQ nanoflow                                           | N/A                    | NanoSpray | N/A    | N/A        |
| nano spray modifications | none      | none      | electrospray voltage supplied at T upstream of column. | N/A                    | none      | N/A    | Sheath Gas |

Instrument Software

|                                   |            |            |            |           |          |                               |         |
|-----------------------------------|------------|------------|------------|-----------|----------|-------------------------------|---------|
| Xcalibur version                  | 2.0 SR2    | 2.07       | 2.0.5      | 2.0 SR2   | 2.07     | 2.0.7                         | 2.0 SR2 |
| FT Programs (Orbitrap)            | 2.0.2.0614 | 2.0.7 0703 | 2.0.1.0539 | 2.02.0614 | 2.0.7    | N/A                           | N/A     |
| LTQ MS or LTQ-Orbi MS             | 2.2 SP1    | 2.4 SP1    | 2.4        | 2.2       | 2.4      | 2.4                           | 2.2     |
| other instrument software         | Eksigent   | Eksigent   |            | Eksigent  | Eksigent | Eksigent Autosampler          |         |
| other instrument software version | 2.08       | 2.08       |            | v.2.08    | 2.08     | v.2.08                        |         |
| software comments                 |            |            |            |           |          | Agilent ChemStation v.A.10.02 |         |

Study

Site  
 Instrument  
 Instrument model  
 Parameter Units Suggested Range SOP Value

**Sample Handling**

Storage Temp. C -20 or -80

**Chromatography**

HPLC Manufacturer

HPLC Model

autosampler manufacturer

autosampler model

pre-column used Y|N

pre-column is vented Y|N

pre-column length cm 2-4

pre-column ID um 100

split-flow used Y|N

loading flowrate nl/min 1,200

flow-rate from pump nl/min 600

gradient per SOP Y|N Y

first 15 min diverted to waste Y|N Y

comments on chromatography

**Study 8 'Yeast'**

|              |              |              |         |     |      |    |
|--------------|--------------|--------------|---------|-----|------|----|
|              | 65           | 56           | 86      | 65  | 73   | 95 |
| OrbitrapO    | OrbitrapW    | Orbitrap     | LTQ-XLx | LTQ | LTQ2 |    |
| LTQ-Orbitrap | LTQ-Orbitrap | LTQ-Orbitrap | LTQ-XL  | LTQ | LTQ  |    |

|  |     |     |  |     |     |     |
|--|-----|-----|--|-----|-----|-----|
|  | -20 | -80 |  | -20 | -80 | -80 |
|--|-----|-----|--|-----|-----|-----|

|                |                      |               |                |               |                 |
|----------------|----------------------|---------------|----------------|---------------|-----------------|
| Eksigent       | Agilent              | Eksigent      | Eksigent       | Agilent       | Agilent         |
| NanoLC 1D plus | 1100 Nanopump G2226A | 2D nano       | NanoLC 1D plus | 1100 nano     | G2226A Nanopump |
| Eksigent       | Agilent              | Spark Holland | Eksigent       | Spark Holland | Agilent         |
| NanoLC-AS1     | 1100 MicroWPS G1377A | Endurance     | NanoLC-AS1     | Endurance     | G1377A u-WPS    |
| Y              | N                    | N             | Y              | Y             | Y               |
| Y              | N                    | N/A           | Y              | Y             | Y               |
| 4              | 2-4                  | N/A           | 4              | 15            | 4               |
| 100            | 75                   | N/A           | 100            | 100           | 100             |
| N              | N                    | N             | N              | N             | N               |
| 1200           | 700                  | 1000          | 1500           | 1200          | 1,200           |
| 600            | 200                  | 400           | 600            | 600           | 600             |
| Y              | N                    | N             | Y              | Y             | N               |
| Y              | N                    | Y             | Y              | Y             | Y               |

\*note - Due to the design of the 1Dplus HPLC pump, we could not run a gradient from 100-98% Mobile Phase A from 10-15 min. Instead we switched from 100% to 98% at 20 min.

\*\*note - Due to the design of the 1Dplus HPLC pump, we could not run a gradient from 100-98% Mobile Phase A from 10-15 min. Instead we switched from 100% to 98% at 15 min.

**Wash runs**

short wash gradients run on column Y|N

loop washed Y|N

comments on wash steps

**Columns**

manufacturer

packing per SOP Y|N

packing finished on HPLC Y|N

analytical column length cm 11-13

analytical column ID um

other comments on columns

**Nano Spray**

source manufacturer

source model

nano spray modifications

**Instrument Software**

Xcalibur version

FT Programs (Orbitrap)

LTQ MS or LTQ-Orbi MS

other instrument software

other instrument software version

software comments

|   |   |   |   |   |   |
|---|---|---|---|---|---|
| N | Y | Y | N | Y | Y |
| Y | Y | Y | Y | Y | Y |

|                              |                                                    |                                                        |                              |                                        |     |
|------------------------------|----------------------------------------------------|--------------------------------------------------------|------------------------------|----------------------------------------|-----|
| Self made with Jupiter resin | New Objective PicoFrit                             | New Objective PicoFrit Self Pack, 75um id, 10um tip id | Self made with Jupiter resin | Merck                                  |     |
| Y                            | Y                                                  | N/A                                                    | Y                            | Y                                      | Y   |
| Y                            | Y                                                  | Y                                                      | Y                            | Y                                      | Y   |
| 11                           | 12                                                 | 15                                                     | 11                           | 15                                     | 12  |
| 100                          | 75 um id packed with Reprosil C18AQ 3 um particles | 75                                                     | 100                          | 100um Chromolith CapRod Monolithic C18 | 100 |

|           |                                                        |                        |           |        |            |
|-----------|--------------------------------------------------------|------------------------|-----------|--------|------------|
| Thermo    | James A. Hill Instrument Services                      | Jamie Hill Instruments | Thermo    | Thermo | In House   |
| NanoSpray | LTQ nanoflow                                           | N/A                    | NanoSpray | N/A    | N/A        |
| none      | electrospray voltage supplied at T upstream of column. | N/A                    | none      | N/A    | Sheath Gas |

|            |            |               |          |                      |         |
|------------|------------|---------------|----------|----------------------|---------|
| 2.07       | 2.0.5      | 2.0.7         | 2.07     | 2.0.7                | 2.0 SR2 |
| 2.0.7 0703 | 2.0.1.0539 | 2.0.7 0703    | 2.0.7    | N/A                  | N/A     |
| 2.4 SP1    | 2.5        | 2.4 SP1       | 2.4      | 2.4                  | 2.2     |
| Eksigent   |            | Eksigent 2.08 | Eksigent | Eksigent Autosampler |         |
| 2.08       |            |               | 2.08     | v.2.08               |         |
|            |            |               |          | Agilent ChemStation  |         |
|            |            |               |          | v.A.10.02            |         |

## K. REFERENCES

1. Piening, B. D., Wang, P., Bangur, C. S., Whiteaker, J., Zhang, H., Feng, L. C., Keane, J. F., Eng, J. K., Tang, H., Prakash, A., McIntosh, M. W., and Paulovich, A. (2006) Quality control metrics for LC-MS feature detection tools demonstrated on *Saccharomyces cerevisiae* proteomic profiles. *J Proteome Res* 5, 1527-1534.
2. Bellew, M., Coram, M., Fitzgibbon, M., Igra, M., Randolph, T., Wang, P., May, D., Eng, J., Fang, R., Lin, C., Chen, J., Goodlett, D., Whiteaker, J., Paulovich, A., and McIntosh, M. (2006) A suite of algorithms for the comprehensive analysis of complex protein mixtures using high-resolution LC-MS. *Bioinformatics*.
3. Tabb, D. L., Fernando, C. G., and Chambers, M. C. (2007) MyriMatch: highly accurate tandem mass spectral peptide identification by multivariate hypergeometric analysis. *J Proteome Res* 6, 654-661.
4. Zhang, B., Chambers, M. C., and Tabb, D. L. (2007) Proteomic parsimony through bipartite graph analysis improves accuracy and transparency. *J Proteome Res* 6, 3549-3557.
5. Ghaemmaghami, S., Huh, W. K., Bower, K., Howson, R. W., Belle, A., Dephoure, N., O'Shea, E. K., and Weissman, J. S. (2003) Global analysis of protein expression in yeast. *Nature* 425, 737-741.
